# Supplementary material
Source: PubMed Central journal article supplement (PMC2790863)
Supplement: NIHMS161175-supplement-Supporting_Information.pdf [file NIHMS161175-supplement-Supporting_Information.pdf]

Supporting Information for:

# Hydrogels Cross-Linked by Catalyst-Free Native Chemical Ligation

Bi-Huang Hu<sup>†,‡</sup>, Jing Su<sup>†,§</sup>, and Phillip B. Messersmith<sup>†,§,\*</sup>

<sup>‡</sup>*Biomedical Engineering Department, Northwestern University, USA*

<sup>§</sup>*Institute for Bionanotechnology in Medicine, Northwestern University, USA*

<sup>†</sup>*College of Oceanography, Hainan University, China*

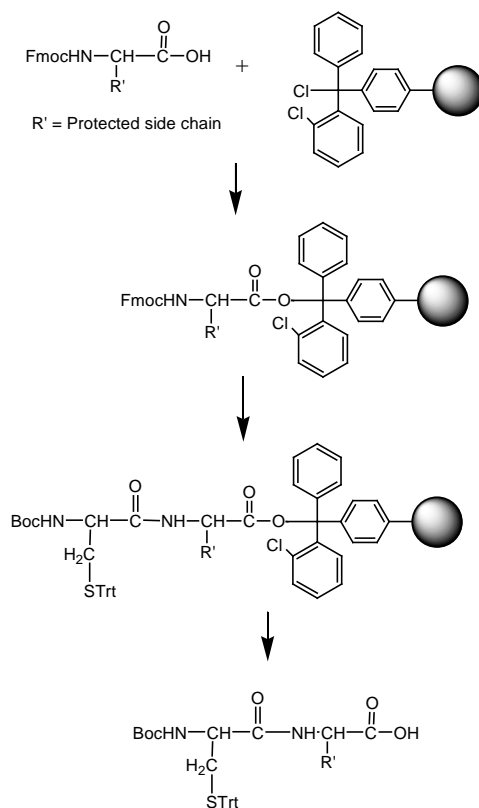

**Scheme S1.** Solid-phase synthesis of protected cysteine dipeptides.

**Table S1.** Effect of polymer concentration, stoichiometry, buffer and temperature on gel formation\* of **1** and **2** by native chemical ligation.

| Test | C <sup>1</sup> | Buffer system                     | R <sup>2</sup>   | T (°C) | Gelation time |
|------|----------------|-----------------------------------|------------------|--------|---------------|
| 1    | 2              | GIBCO PBS                         | 1:1              | 23     | 3 days        |
| 2    | 5              | 0.1 M PBS, pH 7.6                 | 1:1              | 23     | 2 hrs         |
| 3    | 5              | 0.1 M PBS, pH 7.6                 | 1:2              | 23     | 2 hrs         |
| 4    | 5              | 0.1 M Phosphate, pH 7.6           | 1:1              | 23     | 2 hrs         |
| 5    | 5              | 0.1 M Phosphate, pH 7.6           | 1:2              | 23     | 2 hrs         |
| 6    | 20             | 0.1 M PBS, pH 7.6                 | 1:1              | 37     | 25 min        |
| 7    | 20             | 0.1 M PBS, pH 7.6                 | 1:1              | 23     | 35 min        |
| 8    | 20             | 50 mM Tris buffer, pH 8.2         | 1:1              | 23     | > 60 min      |
| 9    | 20             | 50 mM Tris buffer, pH 8.2         | 1:1              | 37     | > 60 min      |
| 10   | 20             | 0.1 M NaHCO <sub>3</sub> , pH 8.3 | 1:1              | 23     | 15 min        |
| 11   | 20             | 0.1 M NaHCO <sub>3</sub> , pH 8.3 | 1:1              | 37     | 6 min         |
| 12   | 20             | 0.1 M NaHCO <sub>3</sub> , pH 8.3 | 0:1 <sup>3</sup> | 23     | >3 hrs        |

\* gel formation measured by visual inspection

<sup>1</sup> Total polymer concentration (% w/v).

<sup>2</sup> Molecular ratio of **1** to **2** (TFA salt of **2** was used throughout).

<sup>3</sup> Experiment employed compound **2** only

**Table S2.** Gel formation for equimolar mixtures of **1** with different *N*-terminal cysteine-polymers\*

| Test | <i>N</i> -terminal cysteine-polymer | GT <sup>1</sup> | GT <sup>2</sup>     |
|------|-------------------------------------|-----------------|---------------------|
| 1    | Cys-PEG4A, <b>2</b>                 | 5'30"           | 3'47"               |
| 2    | Cys-Gly-PEG4A, <b>3a</b>            | 5'40"           | 3'42"               |
| 3    | Cys-Glu-PEG4A, <b>3b</b>            | 4'40"           | 3'30"               |
| 4    | Cys-Asp-PEG4A, <b>3c</b>            | 7'20"           | 6'34"               |
| 5    | Cys-Trp-PEG4A, <b>3d</b>            | 8'05"           | Gel <sup>3</sup>    |
| 6    | Cys-Trp-PEG4A, <b>3d</b>            |                 | 9'43" <sup>4</sup>  |
| 7    | Cys-Trp-PEG4A, <b>3d</b>            |                 | 11'41" <sup>5</sup> |
| 8    | Cys-Arg-PEG4A, <b>3e</b>            | n/d             | 3'38"               |

\*20% **1** in H<sub>2</sub>O and 20% *N*-terminal cysteine-polymer (**2**, **3a-e**) in 0.2 M NaHCO<sub>3</sub> pH 8.3 at 37°C. Gel formation measured by visual inspection

<sup>1</sup>Gelation time with TFA salt of *N*-terminal cysteine-polymer.

<sup>2</sup>Gelation time with salt-free *N*-terminal cysteine-polymer.

<sup>3</sup> Salt-free *N*-terminal cysteine-polymer gelled immediately after addition of H<sub>2</sub>O and vortex.

<sup>4</sup> Salt-free *N*-terminal cysteine-polymer was dissolved in 20 mM TCEP aqueous solution and **1** in 0.2 M NaHCO<sub>3</sub>.

<sup>5</sup> Salt-free *N*-terminal cysteine-polymer was dissolved in 200 mM 2-mercaptoethanol aqueous solution and **1** in 0.2 M NaHCO<sub>3</sub>.

n/d: not determined.

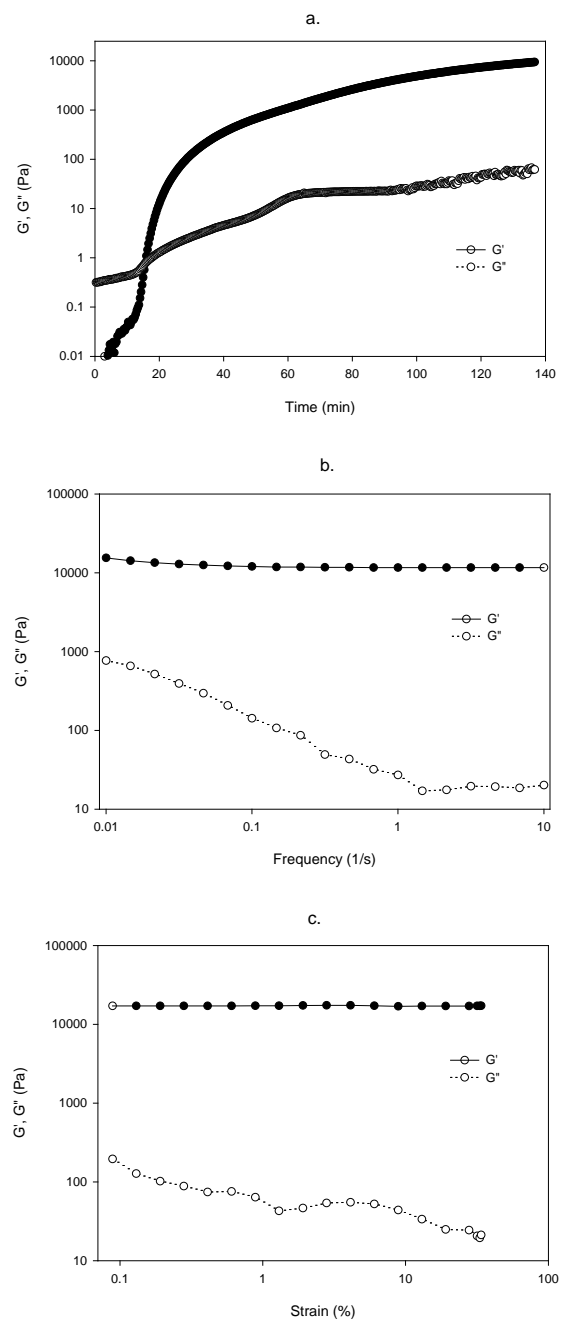

**Figure S1.** Oscillatory rheology of hydrogel containing 20% macromonomer **1** and 20% macromonomer **3c** (1:1) in 100 mM  $\text{NH}_4\text{HCO}_3$ , pH 8.3. a. storage modulus versus time during crosslinking; b. frequency sweep at 1% strain after 180 minutes crosslinking at 20°C; c. strain sweep at 1 Hz frequency after frequency sweep experiment.  $G'$  = storage modulus;  $G''$  = loss modulus (rheology method 1).

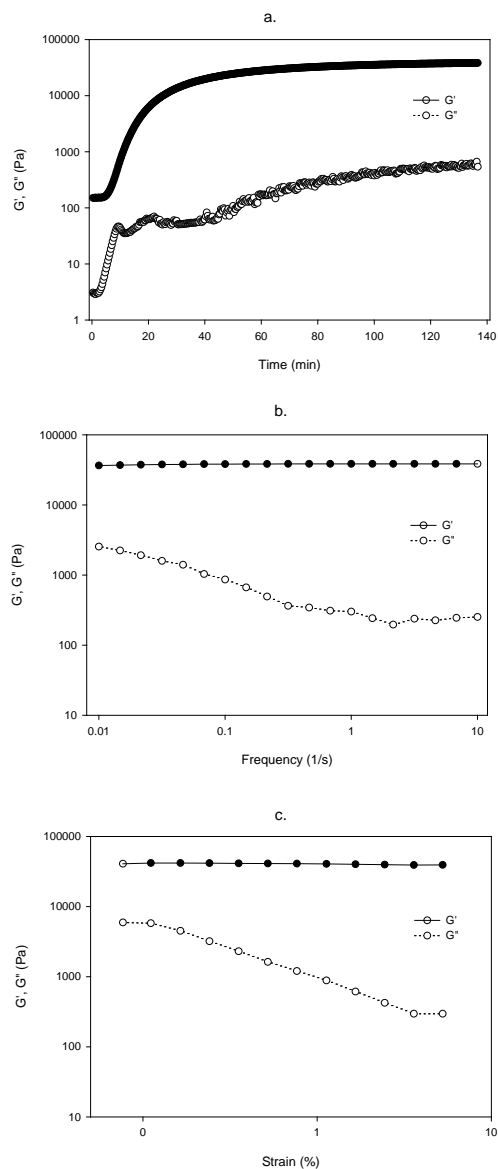

**Figure S2.** Oscillatory rheology of hydrogel containing 20% macromonomer **1** and 20% macromonomer **3b** (1:1) in 100 mM  $\text{NH}_4\text{HCO}_3$ , pH 8.3. a. storage modulus versus time during crosslinking; b. frequency sweep at 1% strain after 180 minutes crosslinking at 20°C; c. strain sweep at 1 Hz frequency after frequency sweep experiment.  $G'$  = storage modulus;  $G''$  = loss modulus (rheology method 1).

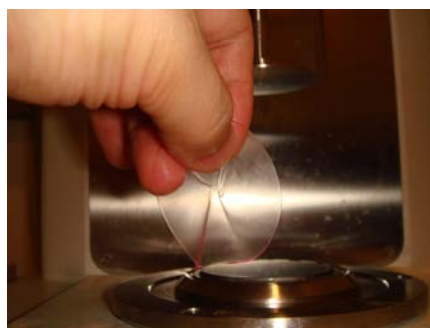

**Figure S3.** Picture of the hydrogel containing 20% macromonomer **1** and 20% macromonomer **3b** (1:1) in 100 mM  $\text{NH}_4\text{HCO}_3$ , pH 8.3 after oscillatory rheology (rheology method 1).

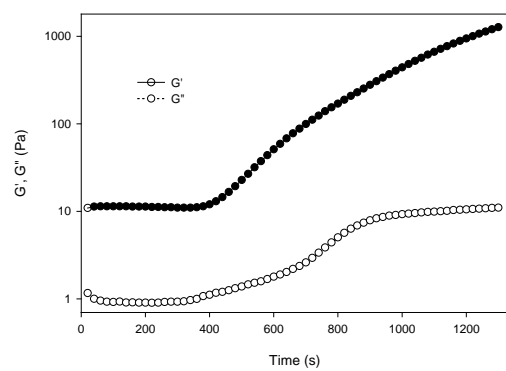

**Figure S4.** Oscillatory rheology of hydrogel containing 10% macromonomer **1** and 10% macromonomer **3b** (1:1) in 100 mM  $\text{NH}_4\text{HCO}_3$ , pH 8.3. Storage modulus versus time during crosslinking;  $G'$  = storage modulus;  $G''$  = loss modulus (rheology method 1).

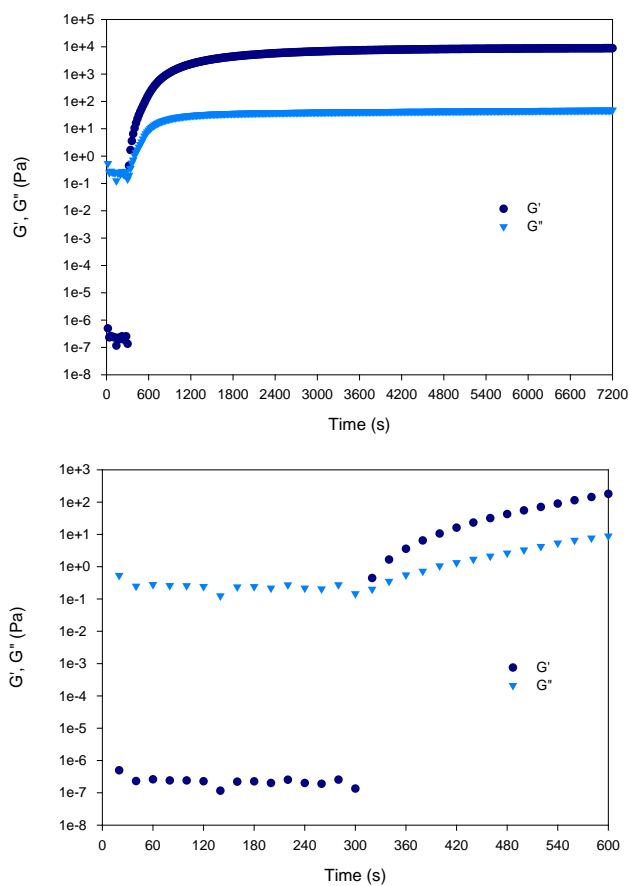

**Figure S5.** Oscillatory rheology of hydrogel containing 10% macromonomer **1** and 10% macromonomer **3a** (1:1) in 100 mM  $\text{NH}_4\text{HCO}_3$ , pH 8.3. Storage ( $G'$ ) and loss ( $G''$ ) modulus versus time during crosslinking are shown, with detail of the first 600 seconds shown at bottom. (Rheology method 2).

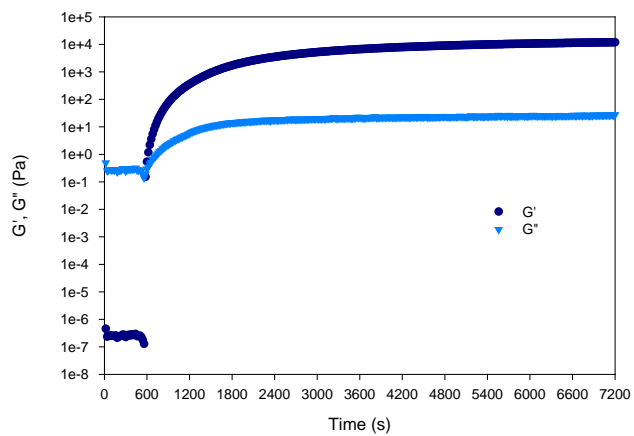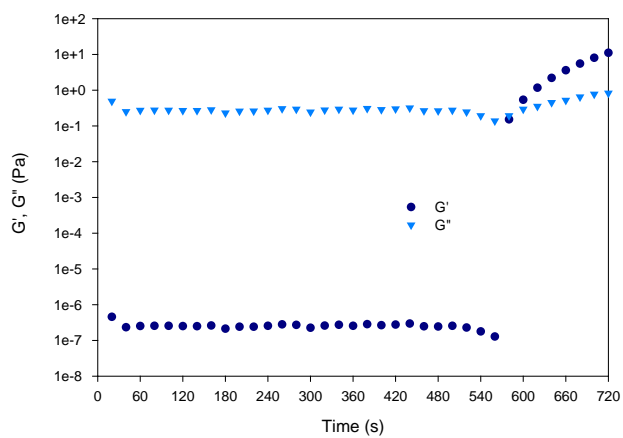

**Figure S6.** Oscillatory rheology of hydrogel containing 10% macromonomer **1** and 10% macromonomer **3c** (1:1) in 100 mM  $\text{NH}_4\text{HCO}_3$ , pH 8.3. Storage ( $G'$ ) and loss ( $G''$ ) modulus versus time during crosslinking are shown, with detail of the first 720 seconds shown at bottom. (Rheology method 2).



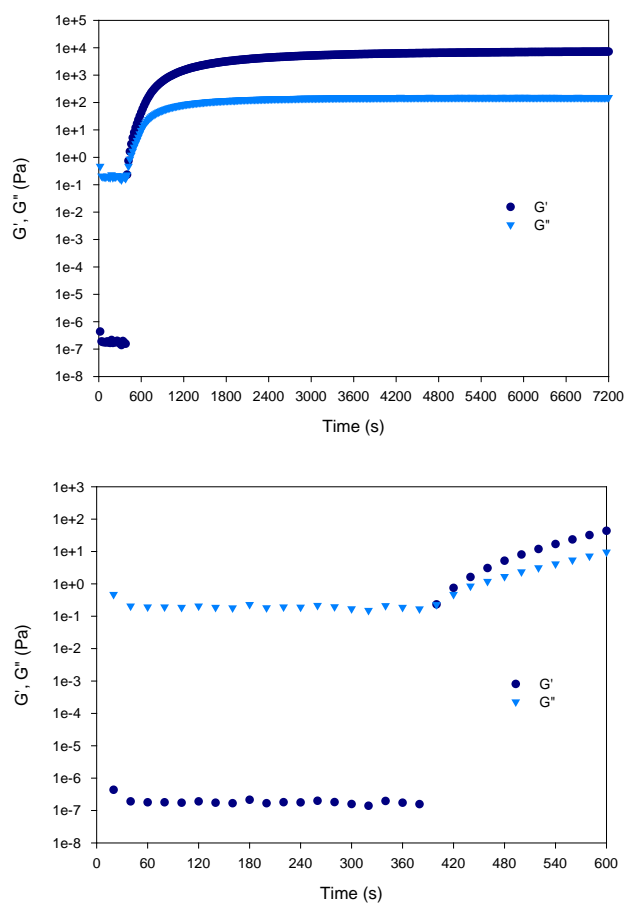

**Figure S7.** Oscillatory rheology of hydrogel containing 10% macromonomer **1** and 10% macromonomer **3d** (1:1) in 100 mM  $\text{NH}_4\text{HCO}_3$ , pH 8.3. Storage ( $G'$ ) and loss ( $G''$ ) modulus versus time during crosslinking are shown, with detail of the first 600 seconds shown at bottom. (Rheology method 2).

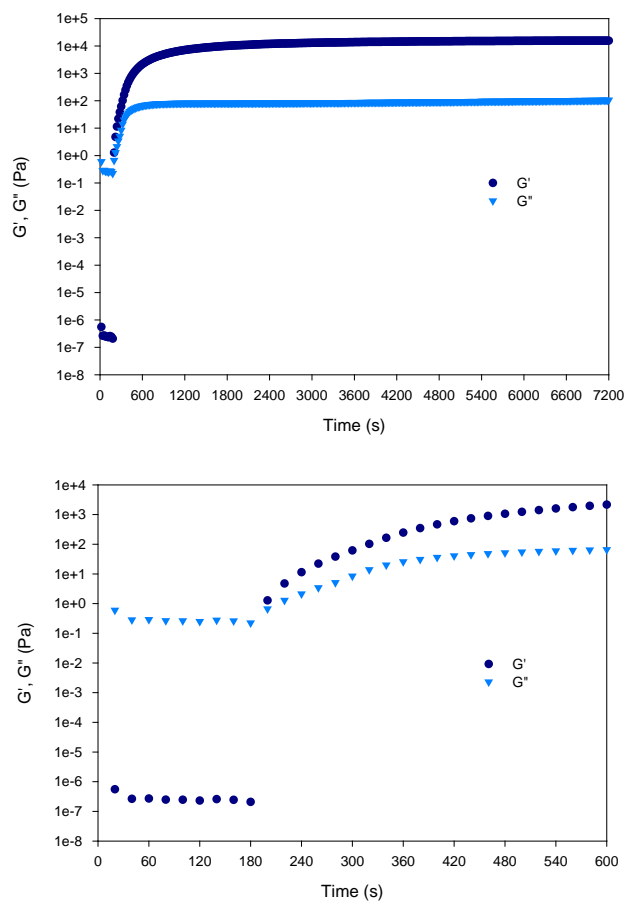

**Figure S8.** Oscillatory rheology of hydrogel containing 10% macromonomer **1** and 10% macromonomer **3e** (1:1) in 100 mM  $\text{NH}_4\text{HCO}_3$ , pH 8.3. Storage ( $G'$ ) and loss ( $G''$ ) modulus versus time during crosslinking are shown, with detail of the first 600 seconds shown at bottom. (Rheology method 2).
